# Supplementary material for: Internet-accessed sexually transmitted infection (e-STI) testing and results service: A randomised, single-blind, controlled trial
Source: PubMed Central journal article supplement (PMC5744909; doi:10.1371/journal.pmed.1002479), 2017-12-27

MNAR imputation odds ratio  
(Control, Intervention)

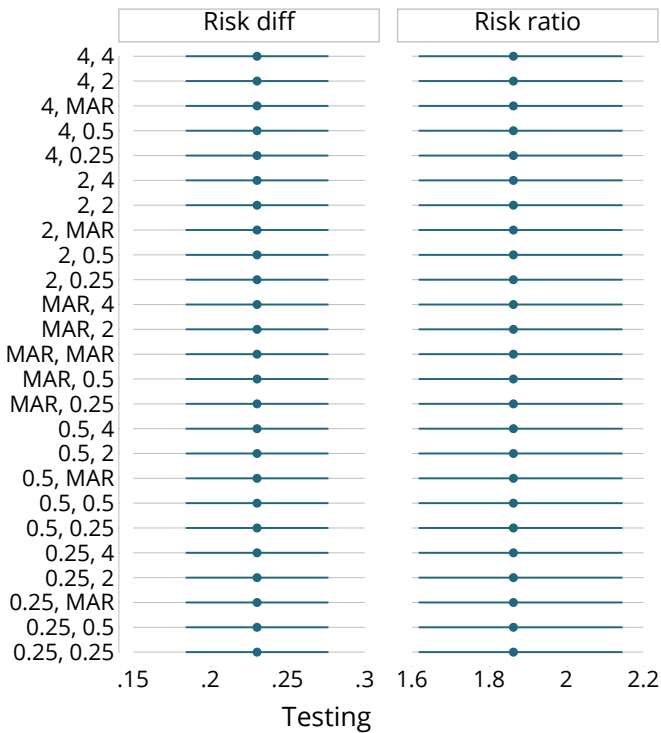

Supplement: pmed.1002479.s003.pdf [file pmed.1002479.s003.pdf]
