# Supplementary material for: Internet-accessed sexually transmitted infection (e-STI) testing and results service: A randomised, single-blind, controlled trial
Source: PubMed Central journal article supplement (PMC5744909; doi:10.1371/journal.pmed.1002479), 2017-12-27
Supplement: pmed.1002479.s005.pdf [file pmed.1002479.s005.pdf]

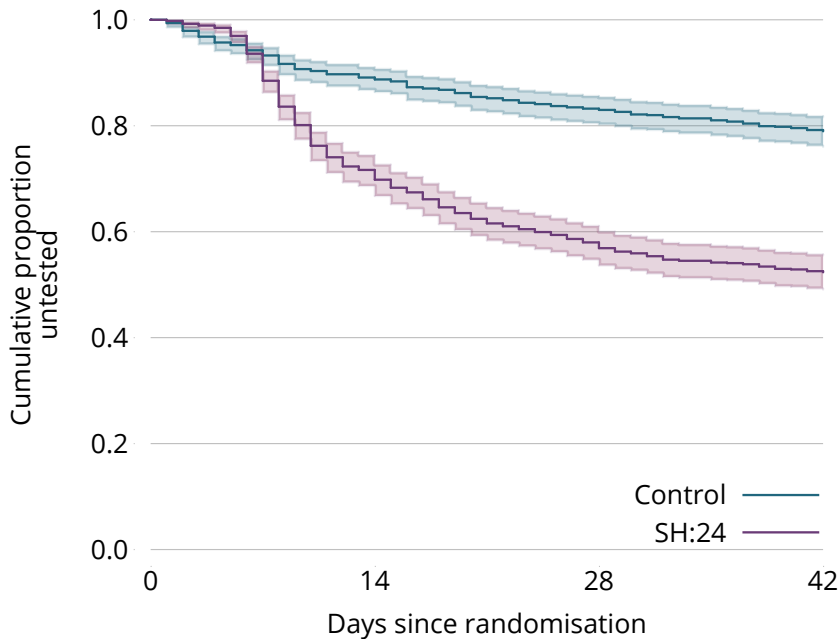

No. remaining

|         |     |     |     |     |     |     |     |
|---------|-----|-----|-----|-----|-----|-----|-----|
| Control | 817 | 770 | 728 | 698 | 680 | 665 | 647 |
| SH:24   | 921 | 862 | 660 | 575 | 534 | 502 | 484 |
