# Supplementary material for: Internet-accessed sexually transmitted infection (e-STI) testing and results service: A randomised, single-blind, controlled trial
Source: PubMed Central journal article supplement (PMC5744909; doi:10.1371/journal.pmed.1002479), 2017-12-27
Supplement: pmed.1002479.s006.pdf [file pmed.1002479.s006.pdf]

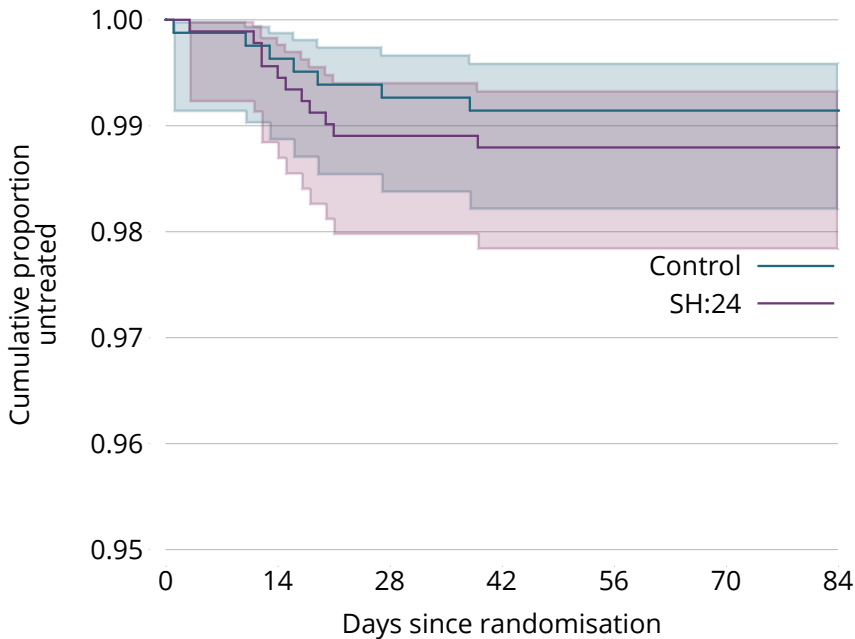

No. remaining

|         |     |     |     |     |     |     |     |
|---------|-----|-----|-----|-----|-----|-----|-----|
| Control | 817 | 814 | 811 | 810 | 810 | 810 | 810 |
| SH:24   | 913 | 909 | 903 | 902 | 902 | 902 | 902 |
